# Supplementary material for: Application of delayed luminescence method on measuring of the processing of Chinese herbal materials
Source: Springer Nature journal article supplement (doi:10.1186/s13020-018-0202-0), 2018-08-25

**Raw**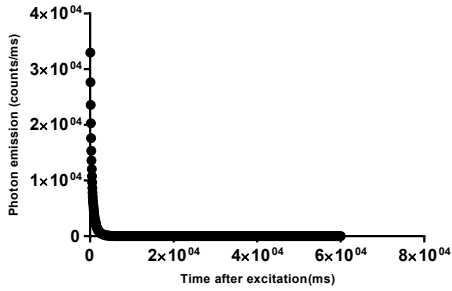**Cycle1**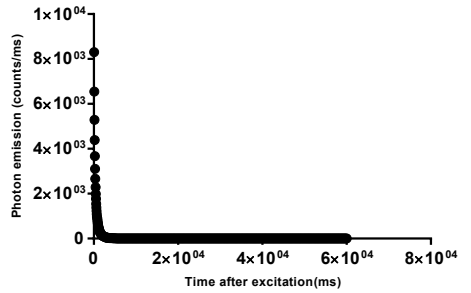**Cycle2**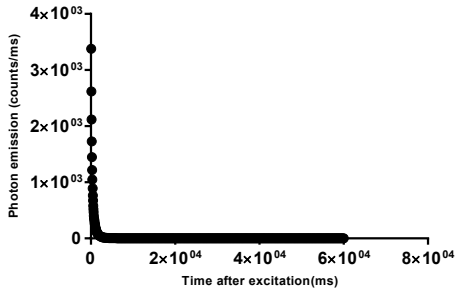**Cycle3**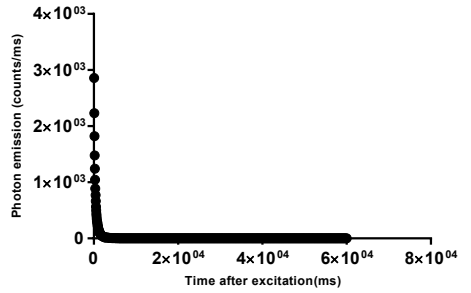**Cycle4**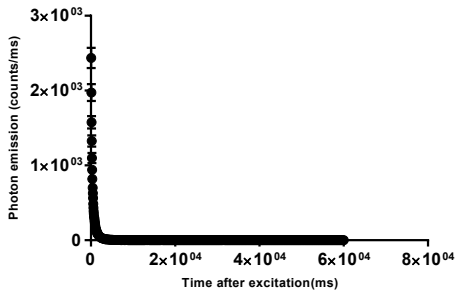**Cycle5**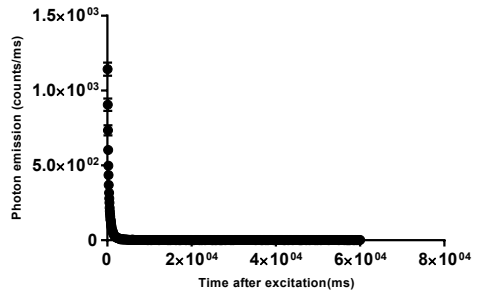**Cycle6**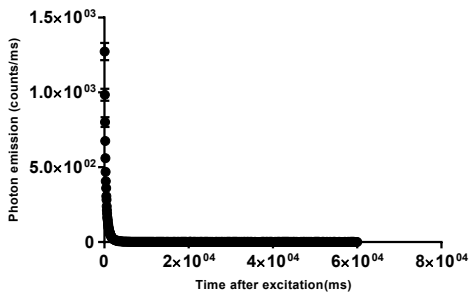**Cycle7**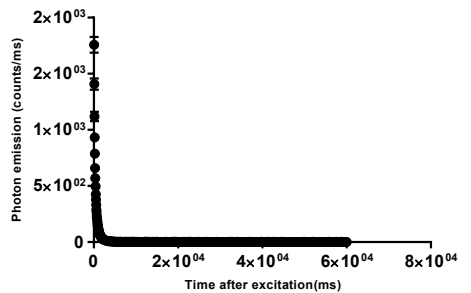**Cycle8**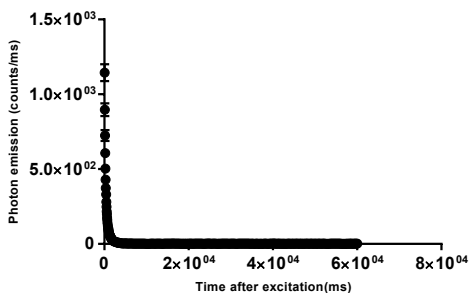**Cycle9**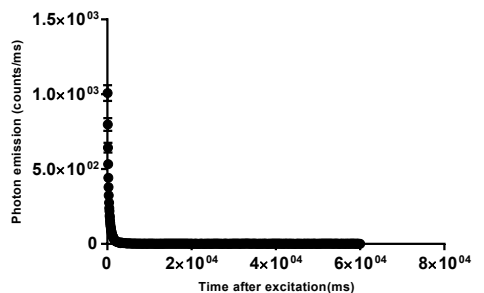

Supplement: MOESM3 [file 16073014]
