# Supplementary material for: Application of delayed luminescence method on measuring of the processing of Chinese herbal materials
Source: Springer Nature journal article supplement (doi:10.1186/s13020-018-0202-0), 2018-08-25

**A****Rehmanniae radix (Raw)**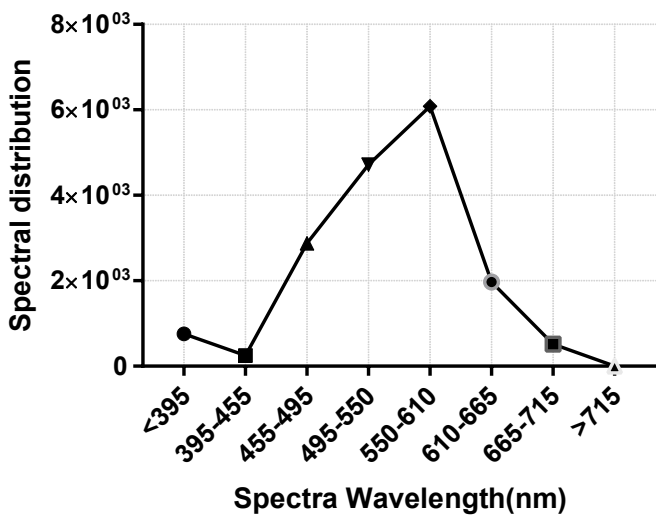**B****White Ginseng**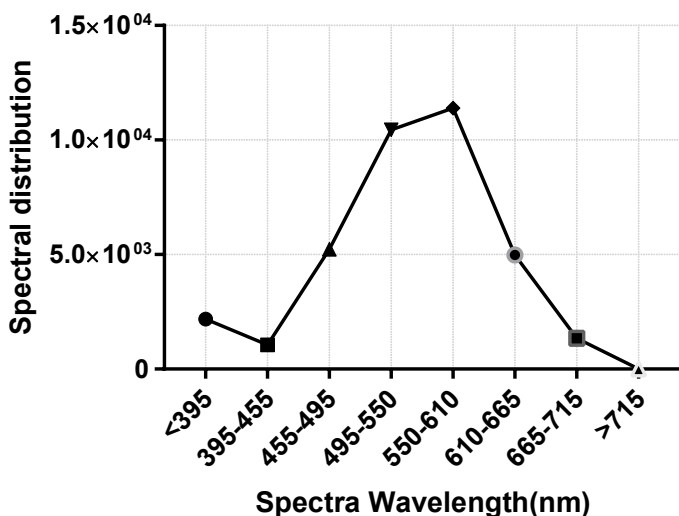**C****Red Ginseng**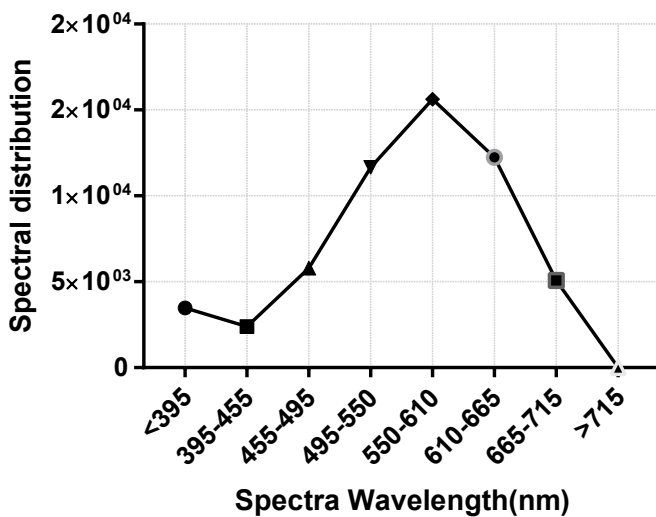

Supplement: MOESM4 [file 16073014]
